# Supplementary material for: Conjugated microporous polymers as an ideal platform for tunable emission via π-conjugation
Source: Royal Society of Chemistry journal article supplement (doi:10.1039/d1nj03500b), 2021-01-01
Supplement: d1nj03500b1.pdf [file d1nj03500b1.pdf]

## **Conjugated microporous polymers as an ideal platform for tunable emission *via* $\pi$ -conjugation**

Yuwei Zhang,<sup>a1</sup> Zhangfu Chen,<sup>b1</sup> Qikun Sun,<sup>c1</sup> Wei Shi,<sup>b</sup> Qianyu Liu,<sup>a</sup> Jieqiong Wan,<sup>bd\*</sup> and Zhongping Li<sup>\*c</sup>

<sup>a</sup> Laboratory of Preparation and Applications of Environmental Friendly Materials (Jilin Normal University), Ministry of Education, Changchun, 130103, China.

<sup>b</sup> Department of Materials Science and Engineering, Yonsei University, Seoul 03722, South Korea.

<sup>c</sup> School of Energy and Chemical Engineering, Ulsan National Institute of Science and Technology, 50 UNIST, Ulsan, 44919 South Korea.

<sup>d</sup> College of Chemistry and Chemical Engineering, Shanghai University of Engineering Science, Shanghai, 201620, China.

**Characterizations:**

The infrared spectra were recorded from 500 to 4000  $\text{cm}^{-1}$  on an Avatar FT-IR 360 spectrometer by using KBr pellets. Elemental analyses were measured by an Elemental model vario EL cube analyzer. Field emission scanning electron microscopy was recorded on a SU8020 model HITACHI microscope. Powder X-ray diffraction data were performed on a PAN analytical BV Empyrean diffractometer by depositing powder on glass substrate, from  $2\theta = 4.0^\circ$  to  $35^\circ$  with  $0.02^\circ$ . Thermogravimetric analysis (TGA) was performed on a TA Q500 thermogravimeter with the heating at a rate of  $10^\circ\text{C min}^{-1}$  from room temperature to  $700^\circ\text{C}$  under nitrogen. Nitrogen sorption isotherms were measured at 77 K with a JW-BK 132F analyzer. The absolute fluorescence quantum yields were measured on Edinburgh FLS920 by using an integrating sphere. Photoluminescence spectra were recorded on a Cary Eclipse Fluorescence Spectrophotometer. Frontier molecular orbital (FMO) plots of HCMPs at the level of B3LYP/6-31G (d,p).

**Preparations :**

4,4',4'',4'''-(pyrene-1,3,6,8-tetrayl)tetrabenzaldehyde (30 mg, 0.049 mmol) and pyromellitic-N,N' bisaminoimide (24 mg, 0.097 mmol) were added into o-DCB (1.2 mL), n-BuOH (0.4 mL), and acetic acid 6 M 0.1 mL were added into the system. The tube was then flash frozen at 77 K and degassed by three freeze-pump-thaw cycles. The mixture was stirred heated about  $100^\circ\text{C}$  under the nitrogen atmosphere for three days. After cooling down to room temperature, the sample was Soxhleted by THF for one day and dried in vacuum at  $80^\circ\text{C}$  for more than 12 h to give a yellow powder (HCMP-1, Yield:83%). The same procedure was for HCMP-2 (Yield:81%)

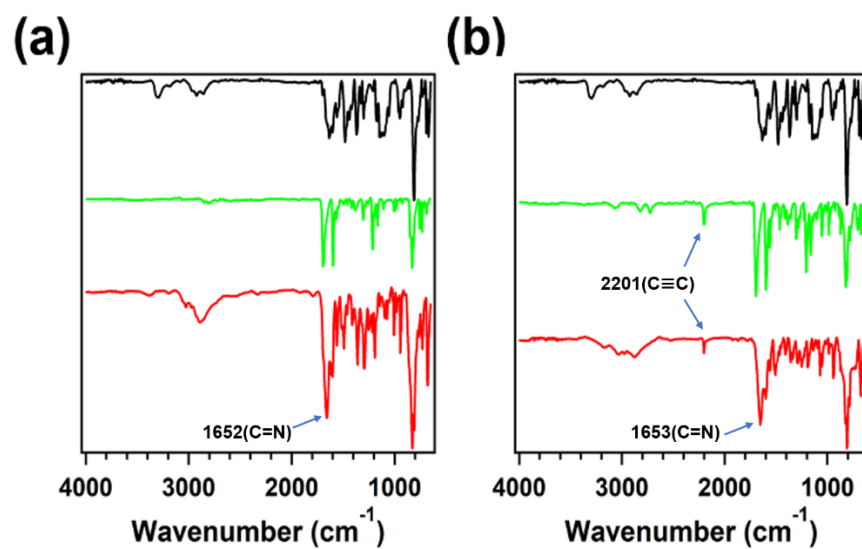

**Fig. S1.** FT IR spectra of (a) HCMP-1 (red curve), building unit-a (green curve), and building unit-c (black curve); (b) HCMP-2 (red curve), building unit-b (green curve), and building unit-c (black curve).

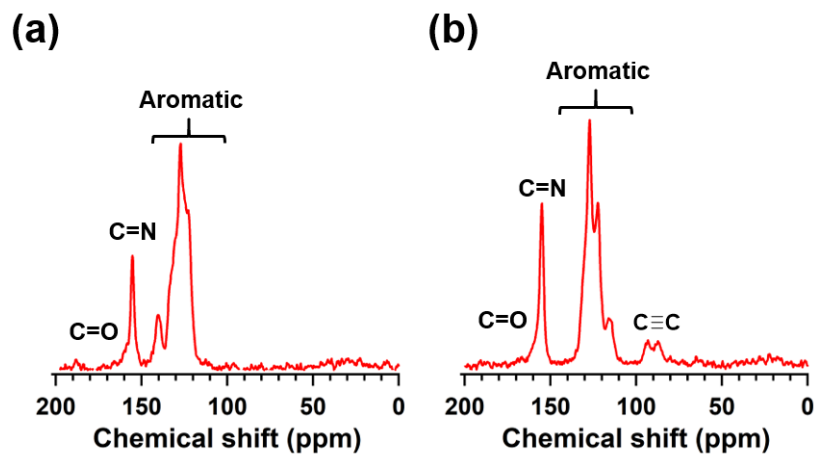

**Fig. S2.** The  $^{13}\text{C}$  CP-MAS NMR spectra of (a) HCMP-1 and (b) HCMP-2.

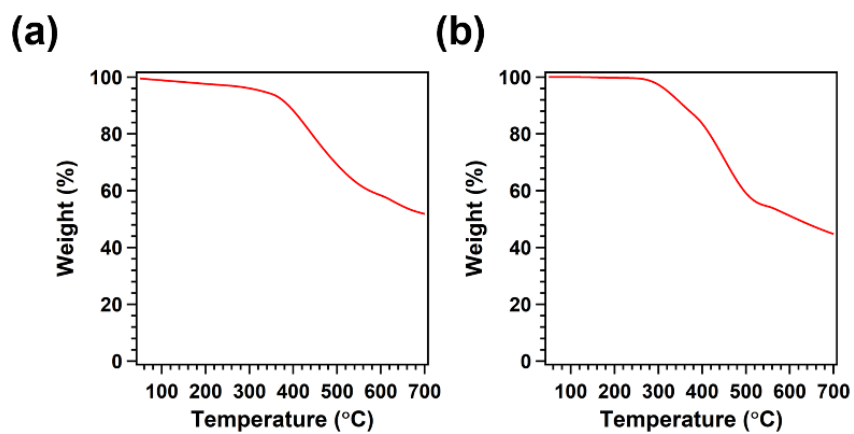

**Fig.S3.** TGA curves of (a) HCMP-1 and (b) HCMP-2 under the nitrogen atmosphere.

**(a)**

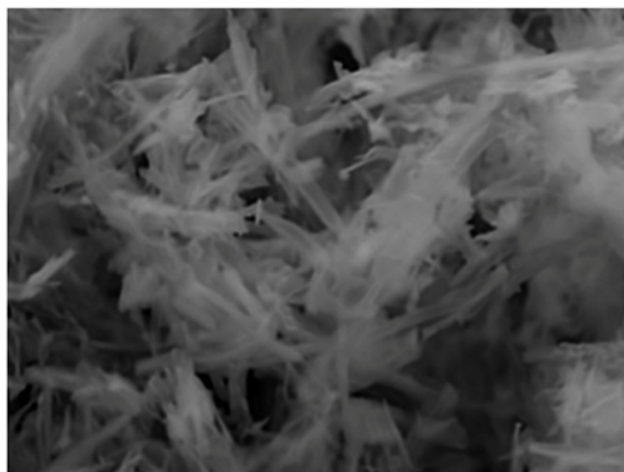

HMMD9.1 x6.0k 10  $\mu$ m

**(b)**

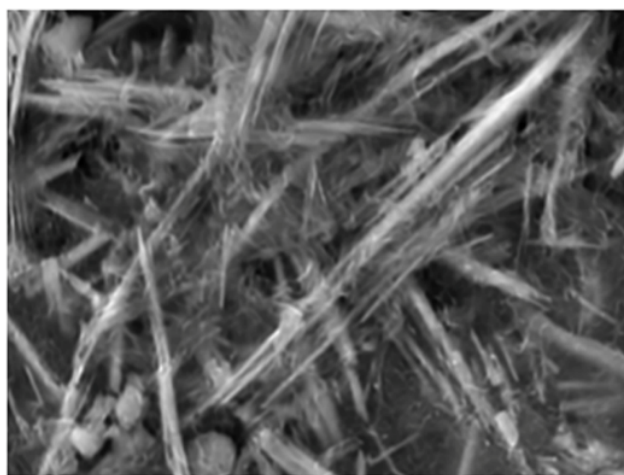

HMMD9.2 x6.0k 10  $\mu$ m

**Fig. S4.** FE SEM images of (a) HCMP-1 and (b) HCMP-2.

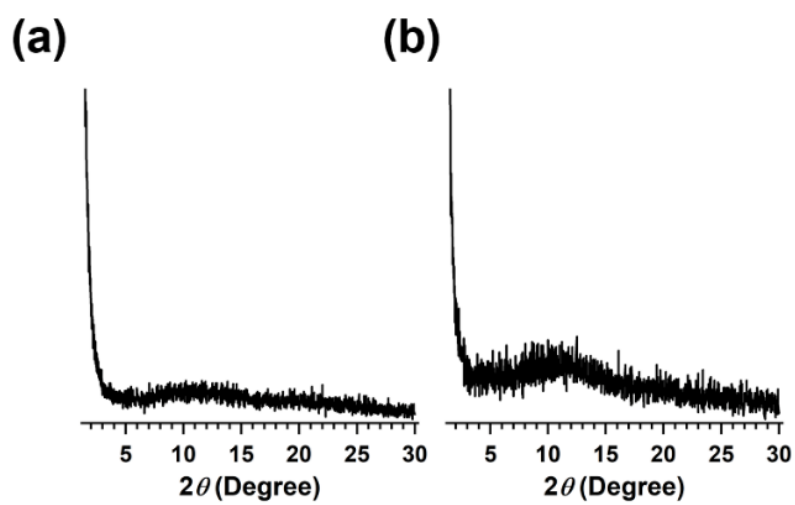

**Fig. S5.** PXRD patterns of (a) HCMP-1 and (b) HCMP-2.

Tab.S1. Elemental analysis of HCMP-1 and HCMP-2.

|        |             | C (%) | N (%) | H (%) |
|--------|-------------|-------|-------|-------|
| HCMP-1 | theoretical | 73.99 | 10.79 | 2.91  |
|        | observed    | 74.03 | 9.71  | 3.15  |
| HCMP-2 | theoretical | 76.19 | 9.87  | 2.66  |
|        | observed    | 77.20 | 8.65  | 3.37  |
